# Supplementary material
Source: Springer Nature journal article supplement (https://www.springermedizin.de/resource/supplementary/13643_2012_25_MOESM4_ESM.pdf/9681306)
Supplement: MOESM4 [file 9681306]

| Item                                                                                                                                                   | Yes | No | Can't say |
|--------------------------------------------------------------------------------------------------------------------------------------------------------|-----|----|-----------|
| 1. Publication date 1995-Dec 2011                                                                                                                      |     |    |           |
| 2. English or French language                                                                                                                          |     |    |           |
| 3. The paper discusses women living in Canada                                                                                                          |     |    |           |
| 4. The paper discusses immigrant women or newcomers                                                                                                    |     |    |           |
| 5. As related to pregnancy and/or the perinatal/postnatal period?                                                                                      |     |    |           |
| 6. Is related to experiences and/or perceptions of maternity care/perinatal care?                                                                      |     |    |           |
| 7. Discusses access and navigation of maternity care/perinatal care and/or pregnancy, perinatal or postnatal outcomes of immigrant and newcomer women? |     |    |           |
